# Supplementary material for: Novel electrospun bead-like Ag2MoO4 nanofibers coated on Ni foam for visible light-driven heterogeneous photocatalysis and high-performance supercapacitor electrodes
Source: Royal Society of Chemistry journal article supplement (doi:10.1039/d3cp04751b), 2023-12-11
Supplement: d3cp04751b1.pdf [file d3cp04751b1.pdf]

## Novel electrospun bead-like $\text{Ag}_2\text{MoO}_4$ nanofibers coated on Ni foam for visible light-driven heterogeneous photocatalysis and high-performance supercapacitor electrode

Amirreza Safartoobi,<sup>a</sup> Jamal Mazloom,<sup>\* a</sup> Farhad Esmaili Ghodsi<sup>a</sup>

Department of Physics, Faculty of Science, University of Guilan, Namjoo Avenue, P.O. Box 413351914, Rasht, Iran

Corresponding author. Tel.: +98 1333323132; fax: +98 1333320066

E-mail: j.mazloom@guilan.ac.ir

### Supplementary data

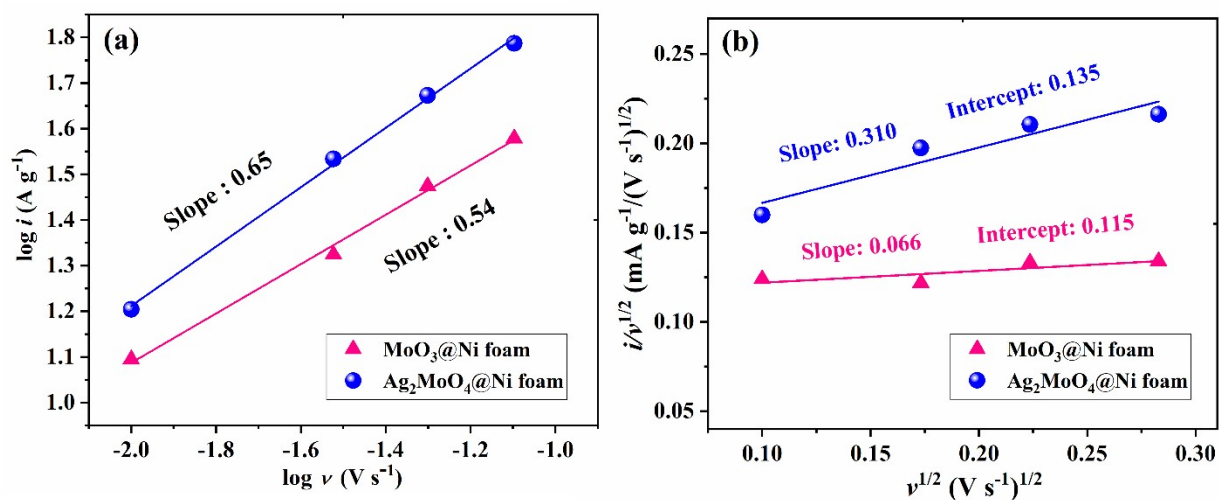

Fig. S1 (a) The plots of  $\log i$  versus  $\log \nu$  for  $\text{MoO}_3@Ni$  foam, and  $\text{Ag}_2\text{MoO}_4@Ni$  foam electrodes. (b) Use of Eq. 10 to analyze the voltammetric scans data for the  $\text{MoO}_3@Ni$  foam, and  $\text{Ag}_2\text{MoO}_4@Ni$  foam electrodes.

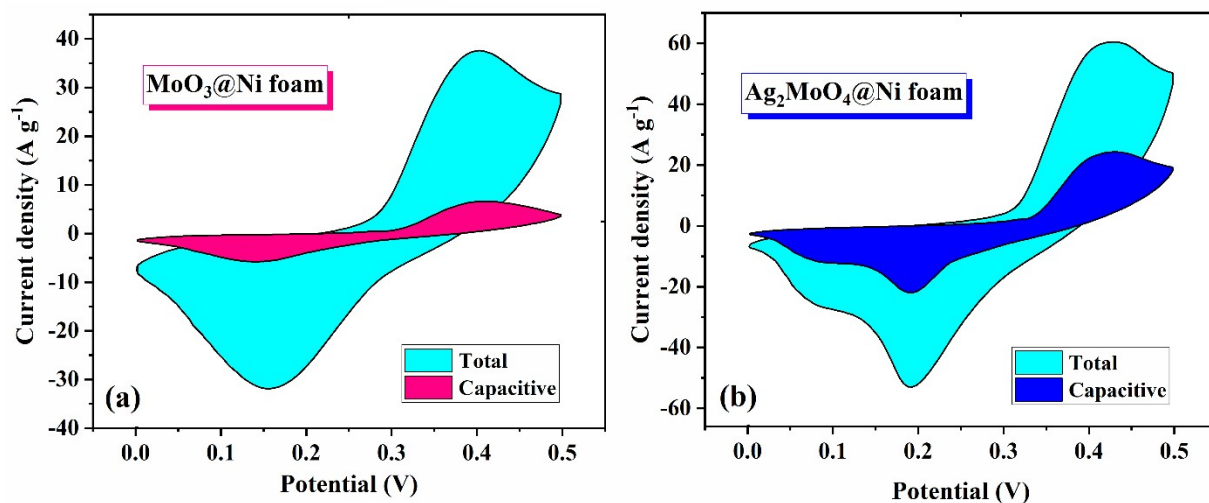

Fig. S2 The capacitive contribution of CV curves at 80 mV s<sup>-1</sup> for (a) MoO<sub>3</sub>@Ni foam, and (b) Ag<sub>2</sub>MoO<sub>4</sub>@Ni foam electrodes.

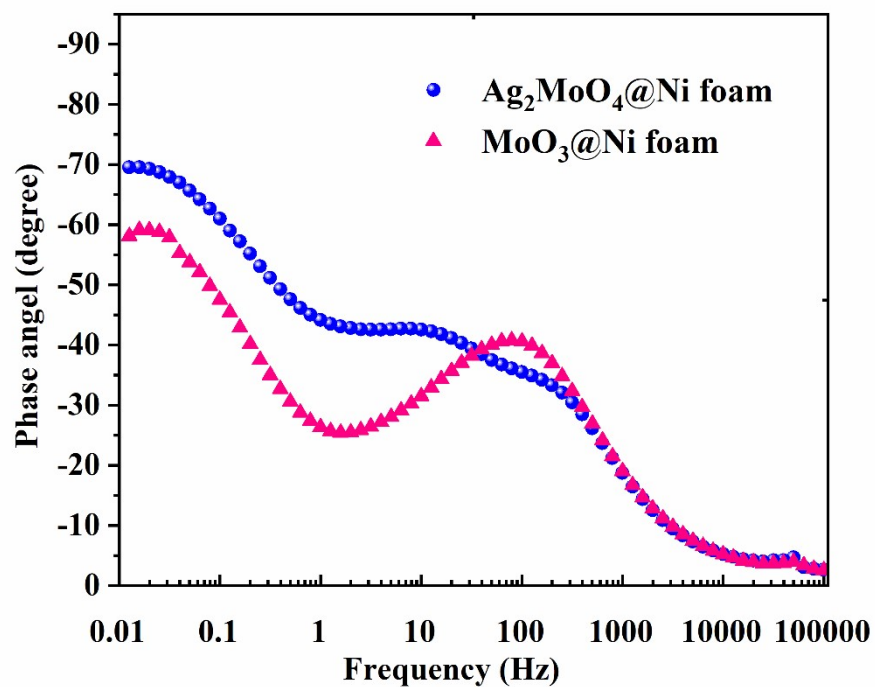

Fig. S3 Bode plot of MoO<sub>3</sub>@Ni foam, and Ag<sub>2</sub>MoO<sub>4</sub>@Ni foam electrodes.

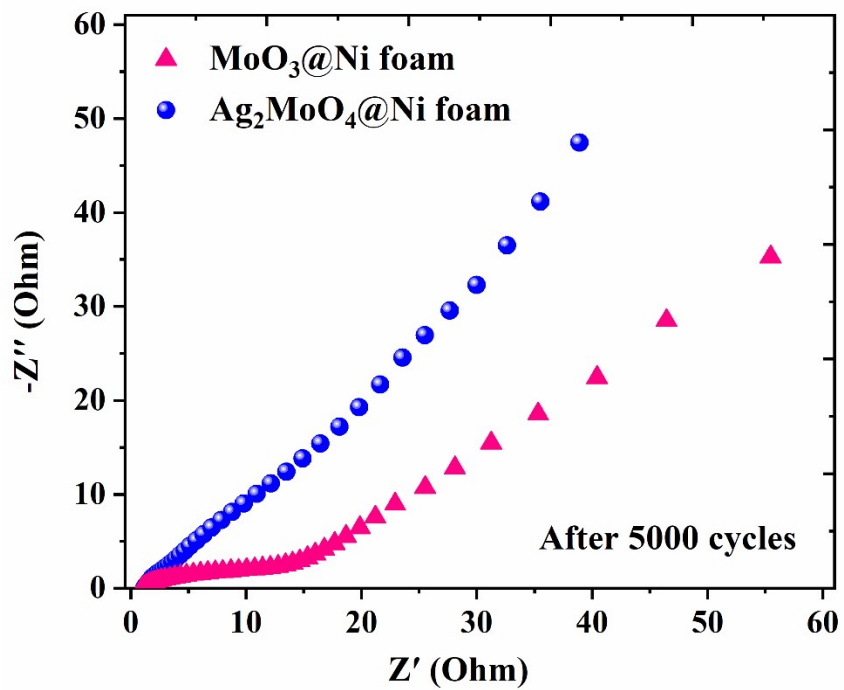

Fig. S4 Nyquist plot of the electrodes after 5000 cycles.

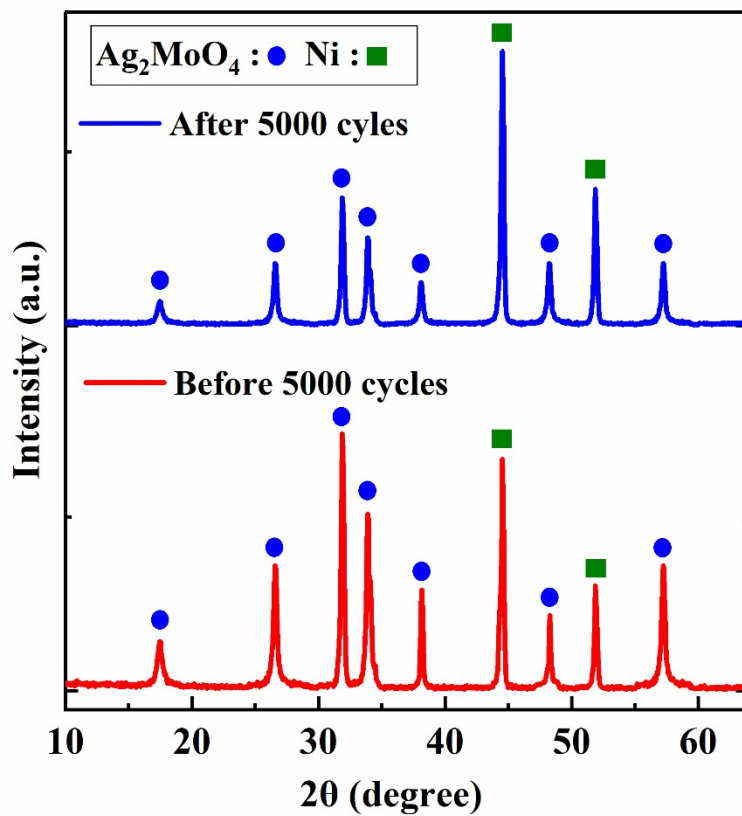

Fig. S5 XRD patterns of the  $\text{Ag}_2\text{MoO}_4@Ni$  foam electrode before and after 5000 cycles.
